# Supplementary material
Source: publisher figshare collection journal article supplement (https://acs.figshare.com/ndownloader/files/4627195)
Supplement: Supplementary file 1 [file 4627195]

## Supporting Information for

### A Facile Route for Creating “Reverse” Vesicles: Insights into “Reverse” Self-Assembly in Organic Liquids

*Shih-Huang Tung, Hee-Young Lee & Srinivasa R. Raghavan\**

Department of Chemical & Biomolecular Engineering

University of Maryland

College Park, MD 20742-2111

\*Corresponding author. email: sraghava@eng.umd.edu

## EXPERIMENTAL SECTION

---

**Materials.** Lecithin (95%) and C<sub>4</sub>-lecithin (> 99%) were purchased from Avanti Polar Lipids. The C<sub>4</sub>-lecithin was supplied as a solution in chloroform. Cyclohexane and NaCl were purchased from J. T. Baker. Deuterated cyclohexane (99.5%D) was purchased from Cambridge Isotopes. All chemicals were used as received

**Sample Preparation.** Mixed solutions containing short- and long-chain lecithin were prepared as follows. Lecithin and NaCl were dissolved in methanol to form 100 mM and 85 mM stock solutions, respectively. The desired amount of C<sub>4</sub>-lecithin was dried from by evaporation in a vacuum oven for at least 12 h. Samples of desired composition were prepared by mixing the lecithin and NaCl stock solutions with the dried C<sub>4</sub>-lecithin. Methanol was removed by evaporation in a vacuum oven for 48 h. The final samples with desired concentrations were obtained by adding cyclohexane or deuterated cyclohexane, followed by stirring at 60°C till the solutions became homogeneous. The samples were then sonicated by a water-bath type sonicator (Branson 1510) for 30 min.

**DLS.** A Photocor-FC light scattering instrument with a 5 mW laser light source at 633 nm was used at 25°C, with the scattering angle being 90°. A logarithmic correlator

was used to obtain the autocorrelation function, which was analyzed by the method of cumulants to yield a diffusion coefficient. The apparent hydrodynamic size was obtained from the diffusion coefficient through the Stokes-Einstein relationship.

**SANS.** SANS measurements were made on the NG-3 (30 m) beamline at NIST in Gaithersburg, MD. Neutrons with a wavelength of 6 Å were selected. The distances between sample chamber and detector were 1.35 m and 13.18 m. The range of scattering vector  $q$  was 0.004~0.4 Å<sup>-1</sup>. Samples were prepared with deuterated cyclohexane and measured in 1 mm quartz cells at 25°C. The scattering spectra were corrected and placed on an absolute scale using calibration standards provided by NIST. The data are shown for the radially averaged intensity  $I$  versus the scattering vector  $q = (4\pi/\lambda) \sin(\theta/2)$ , where  $\lambda$  is the wavelength of incident neutrons and  $\theta$  is the scattering angle. Modeling of SANS data was conducted using software modules provided by NIST to be used with the IGOR graphing package.<sup>1</sup>

**SANS Modeling.** For dilute solutions of non-interacting scatterers, the SANS intensity  $I(q)$  can be modeled purely in terms of the form factor  $P(q)$  of the scatterers (i.e., the structure factor  $S(q) \rightarrow 1$  in this case). In this study, we consider form factor models for three different micellar shapes: spheres, rigid cylinders and unilamellar vesicles. In the expressions below,  $\Delta\rho$  is the difference in scattering length density between the micelle and the solvent, so that  $(\Delta\rho)^2$  is the scattering contrast.

**Ellipsoids.** The form factor  $P(q)$  for ellipsoids of revolution with minor and major axes  $R_a$  and  $R_b$  is given by:<sup>2,3</sup>

$$P(q) = (\Delta\rho)^2 \left( \frac{4}{3} \pi R_a R_b^2 \right)^2 \int_0^1 \left[ 3 \frac{(\sin x - x \cos x)}{x^3} \right]^2 d\mu \quad (1)$$

where  $x = q \sqrt{\mu^2 R_b^2 + R_a^2 (1 - \mu^2)}$ . Here  $\mu$  is the cosine of the angle between the scattering vector  $q$  and the symmetry axis of the ellipsoid.

**Rigid Cylinders.** The form factor  $P(q)$  for rigid cylindrical rods of radius  $R_c$  and length  $L$  is given by:<sup>2,3</sup>

$$P_{cylinder}(q) = (\Delta\rho)^2 \left( \pi R_c^2 L \right)^2 \int_0^{\pi/2} [F(q, \alpha)]^2 \sin \alpha d\alpha \quad (2)$$

where

$$F(q, \alpha) = \frac{J_1(q R_c \sin \alpha)}{(q R_c \sin \alpha)} \cdot \frac{\sin(q L \cos \alpha / 2)}{(q L \cos \alpha / 2)} \quad (3)$$

Here  $\alpha$  is the angle between the cylinder axis and the scattering vector  $q$  and  $J_1(x)$  is the first-order Bessel function of the first kind.

**Unilamellar Vesicles.** The form factor  $P(q)$  for unilamellar vesicles of radius  $R$  and bilayer thickness  $t$  is given by the following expression:<sup>2,3</sup>

$$P(q) = (\Delta\rho)^2 \left\{ \frac{4}{3} \pi R^3 \frac{3J_1(qR)}{qR} - \frac{4}{3} \pi (R+t)^3 \frac{3J_1[q(R+t)]}{q(R+t)} \right\}^2 \quad (4)$$

$J_1(x)$  is the first-order Bessel function, given by:

$$J_1(x) = \frac{\sin x - x \cos x}{x^2} \quad (5)$$

For thin bilayers ( $t \ll R$ ), or equivalently for large vesicles,  $P(q)$  reduces to the following expression:

$$P(q) = (\Delta\rho)^2 \cdot (4\pi R)^2 \cdot \frac{t^2}{q^2} \sin^2(qR) \quad (6)$$

Eq (6) indicates that for large, non-interacting vesicles,  $I(q)$  should show a  $q^{-2}$  decay in the low  $q$  range. If, the vesicles are polydisperse, the form factor has to be averaged over the vesicle distribution in the following manner:<sup>2,3</sup>

$$P(q) = \int f(R) \cdot P(q, R) dR \quad (7)$$

where  $P(q, R)$  is the form factor for a vesicle of radius  $R$  (eq 6). The polydispersity in vesicle radius  $f(R)$  can be accounted for by a Schultz distribution:

$$f(R) = \left( \frac{p+1}{R_0} \right)^{z+1} \frac{R^z}{\Gamma(z+1)} \exp \left( - (z+1) \frac{R}{R_0} \right) \quad (8)$$

In the above expression,  $R_0$  is the average vesicle radius and  $\Gamma$  is gamma function. The polydispersity  $p_d$  is given by:

$$p_d = \frac{1}{\sqrt{z+1}} \quad (9)$$

**TEM.** TEM was conducted on a Jeol JEM 2100 microscope at 80 KeV. The positive staining agent, ammonium molybdate (from Sigma-Aldrich), was dissolved in methanol to form a 13 mM stock solution. Desired amounts of this compound were combined with the stock solutions during sample preparation, as described above. The final reverse vesicle samples were diluted to 1 mM and a 1  $\mu$ L drop was applied on a carbon-coated copper grid, which was then air-dried before imaging was conducted.

## REFERENCES

---

- [1] Kline, S. R. "Reduction and analysis of SANS and USANS data using IGOR Pro." *Journal of Applied Crystallography* **2006**, 39, 895-900.
- [2] *Neutron, X-Ray and Light Scattering: Introduction to an Investigative Tool for Colloidal and Polymeric Systems*; Zemb, T.; Lindner, P., Eds.; Elsevier: Amsterdam, 1991.
- [3] Pedersen, J. S. "Analysis of small-angle scattering data from colloids and polymer solutions: modeling and least-squares fitting." *Advances in Colloid and Interface Science* **1997**, 70, 171-210.
